# Supplementary material
Source: PubMed Central journal article supplement (PMC1283521)
Supplement: nar_33_19_6214__1.pdf [file nar_33_19_6214__1.pdf]

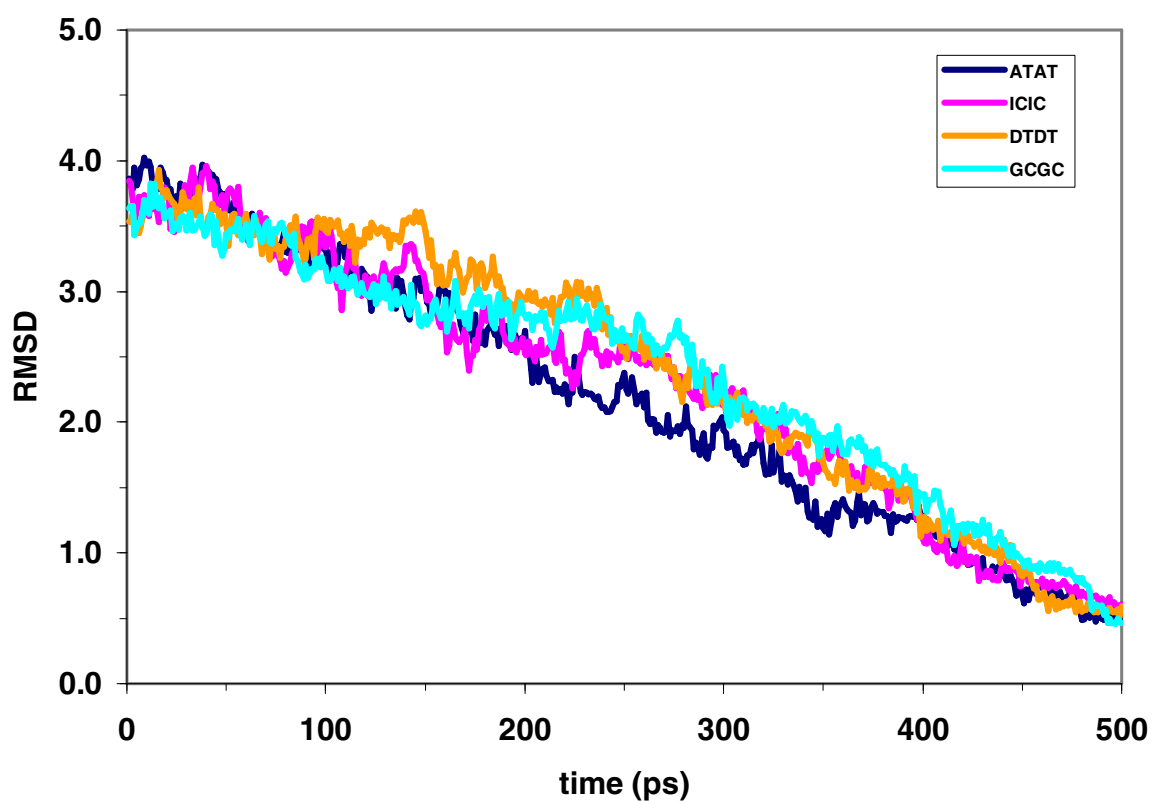

Figure S1. Time evolution of the root-mean-square deviation (RMSD) of the atoms that make up the central tetranucleotide where the bis-intercalators bind along the targeted MD simulations. Similar results were obtained when the simulation lasted 5 ns.

**Table S1.** Intermolecular Distances and Angles Between Hydrogen Bonding Donor and Acceptor Atoms<sup>a</sup> in the Equilibrated Complexes of 2QN and CysMeTANDEM with Each of its Target Decanucleotides.<sup>b</sup>

| Donor-Acceptor    | 2QN: d(GCGGCGCCGC) <sub>2</sub>            |              | 2QN: d(GCGD <del>T</del> DTCGC) <sub>2</sub> |              |
|-------------------|--------------------------------------------|--------------|----------------------------------------------|--------------|
|                   | d (Å)                                      | Angle (°)    | d (Å)                                        | Angle (°)    |
| N2 D6/G6–O Ala2   | 3.5 ± 0.5 (44%)                            | 157.3 ± 9.4  | 3.5 ± 0.5 (40%)                              | 158.7 ± 9.7  |
| N Ala2–N3 D6/G6   | 3.4 ± 0.3 (40%)                            | 152.2 ± 11.5 | 3.4 ± 0.3 (34%)                              | 151.2 ± 12.1 |
| N2 D16/G16–O Ala1 | 3.2 ± 0.3 (71%)                            | 159.7 ± 8.7  | 3.1 ± 0.2 (76%)                              | 159.0 ± 9.1  |
| N Ala1–N3 D16/G16 | 3.7 ± 0.4 (16%)                            | 145.3 ± 12.3 | 3.5 ± 0.3 (31%)                              | 149.1 ± 11.2 |
|                   | CysMeTANDEM:<br>d(CTCATATCAG) <sub>2</sub> |              | CysMeTANDEM:<br>d(CTCICICCAG) <sub>2</sub>   |              |
|                   | d (Å)                                      | Angle (°)    | d (Å)                                        | Angle (°)    |
| N Ala2–N3 A6/I6   | 3.4 ± 0.4 (93%)                            | 123.7 ± 31.0 | 3.3 ± 0.3 (57%)                              | 144.0 ± 15.8 |
| N Ala1–N3 A16/I16 | 3.4 ± 0.3 (35%)                            | 119.3 ± 30.1 | 4.4 ± 0.5 (0%)                               | 113.8 ± 18.2 |
| N Val1/O Ala2     | 3.4 ± 0.4                                  | 138.4 ± 23.7 | 3.5 ± 0.4                                    | 131.3 ± 21.6 |
| N Val2/O Ala1     | 3.2 ± 0.2                                  | 149.9 ± 13.7 | 3.1 ± 0.2                                    | 145.9 ± 20.1 |

<sup>a</sup>Residue numbering scheme as in Figure 3.

<sup>b</sup> Percentages in brackets indicate the percent of snapshots in which these intermolecular distances fulfill the criterion for hydrogen-bond formation ( $d \leq 3.2 \text{ \AA}$ ).

**AMBER PREP file for 5-methyl-cytosine**

0 0 2

5-methyl-cytosine for TI calculations; 6-31G\* RESP charges

cytC.data

DUC INT 1

CORR OMIT DU BEG

0.0

|    |      |    |   |    |    |    |      |        |         |         |
|----|------|----|---|----|----|----|------|--------|---------|---------|
| 1  | DUMM | DU | M | 0  | -1 | -2 | 0.00 | 0.00   | 0.00    | 0.0000  |
| 2  | DUMM | DU | M | 1  | 0  | -1 | 1.00 | 0.00   | 0.00    | 0.0000  |
| 3  | DUMM | DU | M | 2  | 1  | 0  | 1.00 | 90.00  | 0.00    | 0.0000  |
| 4  | P    | P  | M | 3  | 2  | 1  | 1.60 | 119.04 | 200.00  | 1.1659  |
| 5  | O1P  | O2 | E | 4  | 3  | 2  | 1.48 | 109.61 | 150.00  | -0.7761 |
| 6  | O2P  | O2 | E | 4  | 3  | 2  | 1.48 | 109.58 | 20.00   | -0.7761 |
| 7  | O5'  | OS | M | 4  | 3  | 2  | 1.60 | 101.43 | -98.89  | -0.4954 |
| 8  | C5'  | CT | M | 7  | 4  | 3  | 1.44 | 119.00 | -39.22  | -0.0069 |
| 9  | H5'1 | H1 | E | 8  | 7  | 4  | 1.09 | 109.50 | 60.00   | 0.0754  |
| 10 | H5'2 | H1 | E | 8  | 7  | 4  | 1.09 | 109.50 | -60.00  | 0.0754  |
| 11 | C4'  | CT | M | 8  | 7  | 4  | 1.52 | 110.00 | 180.00  | 0.1629  |
| 12 | H4'  | H1 | E | 11 | 8  | 7  | 1.09 | 109.50 | -200.00 | 0.1176  |
| 13 | O4'  | OS | S | 11 | 8  | 7  | 1.46 | 108.86 | -86.31  | -0.3691 |
| 14 | C1'  | CT | B | 13 | 11 | 8  | 1.42 | 110.04 | 105.60  | -0.0116 |
| 15 | H1'  | H2 | E | 14 | 13 | 11 | 1.09 | 109.50 | -240.00 | 0.1963  |
| 16 | N1   | N* | S | 14 | 13 | 11 | 1.49 | 108.10 | -127.70 | -0.0339 |
| 17 | C6   | CM | B | 16 | 14 | 13 | 1.36 | 121.10 | 81.59   | -0.0183 |
| 18 | H6   | H4 | E | 17 | 16 | 14 | 1.08 | 120.00 | 0.00    | 0.2293  |
| 19 | C5   | CM | B | 17 | 16 | 14 | 1.36 | 121.00 | 180.00  | -0.3185 |
| 20 | C7   | CT | 3 | 19 | 17 | 16 | 1.09 | 120.00 | 180.00  | -0.3646 |
| 21 | H71  | HC | E | 20 | 19 | 17 | 1.08 | 109.50 | 60.00   | 0.1157  |
| 22 | H72  | HC | E | 20 | 19 | 17 | 1.08 | 109.50 | 180.00  | 0.1157  |
| 23 | H73  | HC | E | 20 | 19 | 17 | 1.08 | 109.50 | 300.00  | 0.1157  |
| 24 | C4   | CA | B | 19 | 17 | 16 | 1.43 | 116.90 | 0.00    | 0.8439  |
| 25 | N4   | N2 | B | 24 | 19 | 17 | 1.32 | 120.10 | 180.00  | -0.9773 |
| 26 | H41  | H  | E | 25 | 24 | 19 | 1.01 | 117.70 | 180.00  | 0.4314  |
| 27 | H42  | H  | E | 25 | 24 | 19 | 1.01 | 120.27 | 0.00    | 0.4314  |
| 28 | N3   | NC | B | 24 | 19 | 17 | 1.33 | 121.70 | 0.00    | -0.7748 |
| 29 | H3   | D3 | E | 28 | 24 | 19 | 0.40 | 116.77 | 180.00  | 0.0000  |
| 30 | C2   | C  | S | 28 | 24 | 25 | 1.36 | 120.50 | 0.00    | 0.7959  |
| 31 | O2   | O  | E | 30 | 28 | 24 | 1.24 | 122.40 | 180.00  | -0.6548 |
| 32 | C3'  | CT | M | 11 | 8  | 7  | 1.53 | 115.78 | -329.11 | 0.0713  |
| 33 | H3'  | H1 | E | 32 | 11 | 8  | 1.09 | 109.50 | 30.00   | 0.0985  |
| 34 | C2'  | CT | B | 32 | 11 | 8  | 1.53 | 102.80 | -86.30  | -0.0854 |
| 35 | H2'1 | HC | E | 34 | 32 | 11 | 1.09 | 109.50 | 120.00  | 0.0718  |
| 36 | H2'2 | HC | E | 34 | 32 | 11 | 1.09 | 109.50 | 240.00  | 0.0718  |
| 37 | O3'  | OS | M | 32 | 11 | 8  | 1.42 | 116.52 | -203.47 | -0.5232 |

IMPROPER

|    |     |    |     |
|----|-----|----|-----|
| C6 | C2  | N1 | C1' |
| N1 | N3  | C2 | O2  |
| C4 | H41 | N4 | H42 |
| N1 | C5  | C6 | H6  |
| C6 | C4  | C5 | C7  |
| N3 | C5  | C4 | N4  |
| C2 | C4  | N3 | H3  |

LOOP CLOSING EXPLICIT

|     |     |
|-----|-----|
| C1' | C2' |
| C2  | N1  |

DONE

STOP

**AMBER PREP file for inosine**

0 0 2

Inosine for TI calculations; 6-31G\* RESP charges

ipe.data

IPE INT 1

CORR OMIT DU BEG

0.00000

|    |      |    |   |    |    |    |        |          |          |         |
|----|------|----|---|----|----|----|--------|----------|----------|---------|
| 1  | DUMM | DU | M | 0  | -1 | -2 | 0.0000 | 0.0000   | 0.0000   | 0.00000 |
| 2  | DUMM | DU | M | 1  | 0  | -1 | 3.0000 | 0.0000   | 0.0000   | 0.00000 |
| 3  | DUMM | DU | M | 2  | 1  | 0  | 3.0000 | 90.0000  | -90.0000 | 0.00000 |
| 4  | P    | P  | M | 3  | 2  | 1  | 1.60   | 119.04   | 200.00   | 1.1659  |
| 5  | O1P  | O2 | E | 4  | 3  | 2  | 1.48   | 109.61   | 150.00   | -0.7761 |
| 6  | O2P  | O2 | E | 4  | 3  | 2  | 1.48   | 109.58   | 20.00    | -0.7761 |
| 7  | O5'  | OS | M | 4  | 3  | 2  | 1.60   | 101.43   | -98.89   | -0.4954 |
| 8  | C5'  | CT | M | 7  | 4  | 3  | 1.44   | 119.00   | -39.22   | -0.0069 |
| 9  | H5'1 | H1 | E | 8  | 7  | 4  | 1.09   | 109.50   | 60.00    | 0.0754  |
| 10 | H5'2 | H1 | E | 8  | 7  | 4  | 1.09   | 109.50   | -60.00   | 0.0754  |
| 11 | C4'  | CT | M | 8  | 7  | 4  | 1.52   | 110.00   | 180.00   | 0.1629  |
| 12 | H4'  | H1 | E | 11 | 8  | 7  | 1.09   | 109.50   | -200.00  | 0.1176  |
| 13 | O4'  | OS | S | 11 | 8  | 7  | 1.46   | 108.86   | -86.31   | -0.3691 |
| 14 | C1'  | CT | B | 13 | 11 | 8  | 1.42   | 110.04   | 105.60   | 0.0431  |
| 15 | H1'  | H2 | E | 14 | 13 | 11 | 1.09   | 109.50   | -240.00  | 0.1838  |
| 8  | N9   | N* | S | 4  | 3  | 2  | 1.4798 | 37.8434  | 205.2975 | -0.0138 |
| 9  | C8   | CK | B | 8  | 4  | 3  | 1.3867 | 126.9832 | 119.9587 | 0.0783  |
| 10 | H8   | H5 | E | 9  | 8  | 4  | 1.0625 | 121.8634 | 0.0287   | 0.1773  |
| 11 | N7   | NB | S | 9  | 8  | 4  | 1.2976 | 111.9036 | 180.0196 | -0.5367 |
| 12 | C5   | CB | S | 11 | 9  | 8  | 1.3858 | 105.6528 | 0.0000   | 0.1663  |
| 13 | C6   | C  | B | 12 | 11 | 9  | 1.4327 | 130.4467 | 179.9769 | 0.5066  |
| 14 | O6   | O  | B | 13 | 12 | 11 | 1.5387 | 130.6550 | 0.1288   | -0.5472 |
| 15 | H61  | D6 | E | 14 | 13 | 12 | 0.4    | 120.0290 | 359.9088 | 0.0000  |
| 16 | H62  | D6 | E | 14 | 13 | 12 | 0.4    | 119.9751 | 179.8939 | 0.0000  |
| 17 | N1   | NA | B | 13 | 12 | 11 | 1.4196 | 109.5335 | 180.0248 | -0.4092 |
| 18 | H1   | H  | E | 17 | 13 | 12 | 1.0013 | 114.5060 | 179.9724 | 0.3234  |
| 19 | C2   | CQ | B | 17 | 13 | 12 | 1.3614 | 125.8243 | 0.0740   | 0.2284  |
| 20 | H2   | H5 | E | 19 | 17 | 13 | 1.0691 | 116.4181 | 179.8593 | 0.1571  |
| 21 | N3   | NC | S | 19 | 17 | 13 | 1.2829 | 123.7782 | 359.9587 | -0.5392 |
| 22 | C4   | CB | E | 8  | 4  | 3  | 1.3540 | 126.9783 | 299.9951 | 0.3033  |
| 31 | C3'  | CT | M | 11 | 8  | 7  | 1.53   | 115.78   | -329.11  | 0.0713  |
| 32 | H3'  | H1 | E | 30 | 11 | 8  | 1.09   | 109.50   | 30.00    | 0.0985  |
| 33 | C2'  | CT | B | 30 | 11 | 8  | 1.53   | 102.80   | -86.30   | -0.0854 |
| 34 | H2'1 | HC | E | 32 | 30 | 11 | 1.09   | 109.50   | 120.00   | 0.0718  |
| 35 | H2'2 | HC | E | 32 | 30 | 11 | 1.09   | 109.50   | 240.00   | 0.0718  |
| 36 | O3'  | OS | M | 30 | 11 | 8  | 1.42   | 116.52   | -203.47  | -0.5232 |

IMPROPER

|    |     |    |     |
|----|-----|----|-----|
| C8 | C4  | N9 | C1' |
| N9 | N3  | C4 | C5  |
| N3 | N1  | C2 | H2  |
| C2 | C6  | N1 | H1  |
| N1 | C5  | C6 | O6  |
| N7 | N9  | C8 | H8  |
| C6 | H61 | O6 | H62 |

LOOP

|     |     |
|-----|-----|
| C1' | C2' |
| C4  | C5  |
| C4  | N9  |

DONE

STOP

**AMBER PREP file for 2,6-diamino-purine**

0 0 2

2,6-diamino-purine for TI calculations, 6-31G\* RESP charges

dapab.data

DAP INT 1

CORR OMIT DU BEG

0.0

|    |      |    |   |    |    |    |        |          |          |          |
|----|------|----|---|----|----|----|--------|----------|----------|----------|
| 1  | DU   | DU | M | 0  | -1 | -2 | 0.0000 | 0.0000   | 0.0000   | 0.00000  |
| 2  | DU   | DU | M | 1  | 0  | -1 | 8.8730 | 0.0000   | 0.0000   | 0.00000  |
| 3  | DU   | DU | M | 2  | 1  | 0  | 2.3079 | 90.0000  | -90.0000 | 0.00000  |
| 4  | P    | P  | M | 3  | 2  | 1  | 0.7800 | 64.3232  | 90.0000  | 1.16590  |
| 5  | O1P  | O2 | E | 4  | 3  | 2  | 1.4760 | 114.4963 | 80.5727  | -0.77610 |
| 6  | O2P  | O2 | E | 4  | 3  | 2  | 0.9501 | 56.7517  | 291.4063 | -0.77610 |
| 7  | O5'  | OS | M | 4  | 3  | 2  | 1.5945 | 132.5370 | 282.2855 | -0.49540 |
| 8  | C5'  | CT | M | 7  | 4  | 3  | 1.4498 | 118.7822 | 228.3665 | -0.00690 |
| 9  | H5'1 | H1 | E | 8  | 7  | 4  | 1.0900 | 109.7613 | 93.9934  | 0.07540  |
| 10 | H5'2 | H1 | E | 8  | 7  | 4  | 1.0895 | 109.7582 | 333.9654 | 0.07540  |
| 11 | C4'  | CT | M | 8  | 7  | 4  | 1.5109 | 109.7677 | 213.9796 | 0.16290  |
| 12 | H4'  | H1 | E | 11 | 8  | 7  | 1.0901 | 107.7608 | 156.3397 | 0.11760  |
| 13 | O4'  | OS | S | 11 | 8  | 7  | 1.4632 | 108.6489 | 279.1130 | -0.36910 |
| 14 | C1'  | CT | B | 13 | 11 | 8  | 1.4145 | 109.7846 | 106.4011 | 0.04311  |
| 15 | H1'  | H2 | E | 14 | 13 | 11 | 1.0901 | 107.9285 | 115.7842 | 0.18380  |
| 16 | N9   | N* | S | 14 | 13 | 11 | 1.4877 | 107.7679 | 232.4945 | 0.00498  |
| 17 | C8   | CK | B | 16 | 14 | 13 | 1.3685 | 128.2779 | 82.2317  | 0.12688  |
| 18 | H8   | H5 | E | 17 | 16 | 14 | 1.0905 | 123.1877 | 0.2565   | 0.16505  |
| 19 | N7   | NB | S | 17 | 16 | 14 | 1.2997 | 113.6206 | 180.2646 | -0.59650 |
| 20 | C5   | CB | S | 19 | 17 | 16 | 1.3836 | 103.8157 | 359.3635 | 0.12491  |
| 21 | C6   | C  | B | 20 | 19 | 17 | 1.3661 | 9.5850   | 285.5802 | 0.59450  |
| 22 | N6   | N2 | B | 21 | 20 | 19 | 1.3342 | 53.0502  | 56.7783  | -0.87871 |
| 23 | H61  | H  | E | 22 | 21 | 20 | 1.0296 | 58.6492  | 172.7085 | 0.40649  |
| 24 | H62  | H  | E | 22 | 21 | 20 | 1.0301 | 178.3823 | 136.8361 | 0.40649  |
| 25 | N1   | NA | B | 21 | 20 | 19 | 1.3412 | 60.4955  | 223.2029 | -0.74502 |
| 26 | H1   | D1 | E | 25 | 21 | 20 | 0.4000 | 117.3600 | 179.9000 | 0.00000  |
| 27 | C2   | CA | B | 25 | 21 | 20 | 1.3296 | 118.9288 | 178.9914 | 0.90381  |
| 28 | N2   | N2 | B | 27 | 25 | 21 | 1.4798 | 115.2686 | 180.3182 | -0.97652 |
| 29 | H21  | H  | E | 28 | 27 | 25 | 1.0306 | 119.9936 | 0.0000   | 0.42014  |
| 30 | H22  | H  | E | 28 | 27 | 25 | 1.0296 | 120.0279 | 179.9898 | 0.42014  |
| 31 | N3   | NC | S | 27 | 25 | 21 | 1.3159 | 129.4640 | 0.3197   | -0.65999 |
| 32 | C4   | CB | E | 31 | 27 | 25 | 1.3459 | 110.2047 | 359.7759 | 0.17788  |
| 33 | C3'  | CT | M | 11 | 8  | 7  | 1.5272 | 116.3826 | 36.3615  | 0.07130  |
| 34 | H3'  | H1 | E | 33 | 11 | 8  | 1.0901 | 111.1425 | 33.6094  | 0.09850  |
| 35 | C2'  | CT | B | 33 | 11 | 8  | 1.5202 | 102.8645 | 273.6140 | -0.08524 |
| 36 | H2'1 | HC | E | 35 | 33 | 11 | 1.0903 | 111.3657 | 205.0801 | 0.07180  |
| 37 | H2'2 | HC | E | 35 | 33 | 11 | 1.0894 | 111.3650 | 85.0665  | 0.07180  |
| 38 | O3   | OS | M | 33 | 11 | 8  | 1.4265 | 112.1694 | 156.4746 | -0.52320 |

IMPROPER

|    |     |    |     |
|----|-----|----|-----|
| C6 | H61 | N6 | H62 |
| C2 | H21 | N2 | H22 |
| N7 | N9  | C8 | H8  |
| N1 | N3  | C2 | N2  |
| C5 | N1  | C6 | N6  |
| N1 | N3  | C2 | N2  |
| N7 | N9  | C8 | H8  |
| C6 | C2  | N1 | H1  |

LOOP

|     |     |
|-----|-----|
| C1' | C2' |
| C4  | C5  |
| C4  | N9  |

DONE

STOP

**AMBER PREP file for quinoxaline**

0 0 2

CysMeTANDEM quinoxaline chromophore; 6-31G\* RESP charges

qxn.data

QXN INT 1

CORR OMIT DU BEG

0.00000

|    |      |    |   |    |    |    |        |          |          |           |
|----|------|----|---|----|----|----|--------|----------|----------|-----------|
| 1  | DUMM | DU | M | 0  | -1 | -2 | 0.0000 | 0.0000   | 0.0000   | 0.000000  |
| 2  | DUMM | DU | M | 1  | 0  | -1 | 3.0000 | 0.0000   | 0.0000   | 0.000000  |
| 3  | DUMM | DU | M | 2  | 1  | 0  | 3.0000 | 90.0000  | -90.0000 | 0.000000  |
| 4  | C1   | CA | M | 1  | 2  | 3  | 3.0000 | 90.0000  | 90.0000  | 0.282326  |
| 5  | H2   | HA | E | 4  | 1  | 2  | 1.0670 | 90.0000  | 270.0000 | 0.058160  |
| 6  | N3   | NC | M | 4  | 1  | 2  | 1.2993 | 29.6628  | 90.0000  | -0.541737 |
| 7  | C4   | CB | M | 6  | 4  | 1  | 1.3662 | 118.6143 | 180.0000 | 0.411620  |
| 8  | C5   | CA | M | 7  | 6  | 4  | 1.4097 | 120.1383 | 180.0000 | -0.324433 |
| 9  | H6   | HA | E | 8  | 7  | 6  | 1.0707 | 117.8403 | 0.0000   | 0.185916  |
| 10 | C7   | CA | M | 8  | 7  | 6  | 1.3574 | 119.7937 | 180.0000 | -0.137170 |
| 11 | H8   | HA | E | 10 | 8  | 7  | 1.0716 | 120.1759 | 180.0000 | 0.163712  |
| 12 | C9   | CA | M | 10 | 8  | 7  | 1.4165 | 120.6362 | 0.0000   | -0.137170 |
| 13 | H10  | HA | E | 12 | 10 | 8  | 1.0710 | 119.1897 | 180.0000 | 0.163712  |
| 14 | C11  | CA | M | 12 | 10 | 8  | 1.3565 | 120.5247 | 0.0000   | -0.324433 |
| 15 | H12  | HA | E | 14 | 12 | 10 | 1.0708 | 122.2935 | 180.0000 | 0.185916  |
| 16 | C13  | CB | M | 7  | 6  | 4  | 1.3996 | 120.3973 | 0.0000   | 0.411620  |
| 17 | N14  | NC | M | 16 | 7  | 6  | 1.3643 | 119.5362 | 0.0000   | -0.510937 |
| 18 | C15  | CA | M | 17 | 16 | 7  | 1.2960 | 118.8597 | 0.0000   | 0.083498  |
| 19 | C16  | C  | M | 18 | 17 | 16 | 1.4964 | 120.1073 | 180.0000 | 0.597300  |
| 20 | O17  | O  | E | 19 | 18 | 17 | 1.2228 | 120.3004 | 180.0000 | -0.567900 |

IMPROPER

|     |     |     |     |
|-----|-----|-----|-----|
| C15 | N3  | C1  | H2  |
| N3  | C5  | C4  | C13 |
| C4  | C7  | C5  | H6  |
| C5  | C9  | C7  | H8  |
| C7  | C11 | C9  | H10 |
| C13 | C9  | C11 | H12 |
| N14 | C11 | C13 | C4  |
| C16 | N14 | C15 | C1  |
| C15 | +M  | C16 | O17 |

LOOP

|     |     |
|-----|-----|
| C4  | C13 |
| C15 | C1  |

DONE

STOP

**AMBER PREP file for quinoline**

0 0 2

2QN quinoline chromophore; 6-31G\* RESP charges

2qn.data

2QN INT 1

CORRECT OMIT DU BEG

0.0

|    |     |    |   |    |    |    |        |          |          |           |
|----|-----|----|---|----|----|----|--------|----------|----------|-----------|
| 1  | DU  | DU | M | 0  | -1 | -2 | 0.0000 | 0.0000   | 0.0000   | 0.000000  |
| 2  | DU  | DU | M | 1  | 0  | -1 | 2.4495 | 0.0000   | 0.0000   | 0.000000  |
| 3  | DU  | DU | M | 2  | 1  | 0  | 2.0000 | 144.7356 | -90.0000 | 0.000000  |
| 4  | H5  | HA | M | 3  | 2  | 1  | 3.7912 | 86.7944  | 319.6216 | 0.165641  |
| 5  | C5  | CA | M | 4  | 3  | 2  | 1.0808 | 118.7887 | 43.9467  | -0.253310 |
| 6  | C6  | CA | M | 5  | 4  | 3  | 1.4059 | 119.8764 | 270.5244 | -0.133851 |
| 7  | H6  | HA | E | 6  | 5  | 4  | 1.0802 | 120.1480 | 359.9331 | 0.143678  |
| 8  | C7  | CA | M | 6  | 5  | 4  | 1.4057 | 119.7328 | 179.6767 | -0.087290 |
| 9  | H7  | HA | E | 8  | 6  | 5  | 1.0808 | 120.0570 | 180.6633 | 0.143583  |
| 10 | C8  | CA | M | 8  | 6  | 5  | 1.4058 | 119.8135 | 0.9029   | -0.359955 |
| 11 | H8  | HA | E | 10 | 8  | 6  | 1.0806 | 119.8615 | 179.8028 | 0.180070  |
| 12 | C9  | CB | M | 10 | 8  | 6  | 1.4083 | 119.9120 | 359.5544 | 0.519497  |
| 13 | C10 | CB | M | 12 | 10 | 8  | 1.3831 | 120.2566 | 359.6219 | 0.055632  |
| 14 | C4  | CA | M | 13 | 12 | 10 | 1.3617 | 119.8069 | 180.8568 | -0.178854 |
| 15 | H4  | HA | E | 14 | 13 | 12 | 1.0895 | 119.7083 | 179.5981 | 0.166755  |
| 16 | C3  | CA | M | 14 | 13 | 12 | 1.3469 | 120.5991 | 359.6021 | -0.143611 |
| 17 | H3  | HA | E | 16 | 14 | 13 | 1.0805 | 119.0838 | 179.6788 | 0.124858  |
| 18 | C2  | CA | M | 16 | 14 | 13 | 1.4115 | 119.8436 | 359.2852 | 0.197612  |
| 19 | N1  | NC | E | 18 | 16 | 14 | 1.3503 | 119.0634 | 1.2107   | -0.569855 |
| 20 | C   | C  | M | 18 | 16 | 14 | 1.4491 | 121.3476 | 180.9885 | 0.597300  |
| 21 | O   | O  | E | 20 | 18 | 16 | 1.2297 | 119.5463 | 357.6658 | -0.567900 |

IMPROPER

|    |    |    |   |
|----|----|----|---|
| C3 | N1 | C2 | C |
| C2 | +M | C  | O |

LOOP

|     |    |
|-----|----|
| C10 | C5 |
| C9  | N1 |

DONE

STOP

**Additional AMBER parameters for mutated DNA bases****Atom types**

|          |                                           |
|----------|-------------------------------------------|
| D6 1.008 | Dummy atom of guanine bonded to O6        |
| D5 1.008 | Dummy atom of cytosine bonded to H5       |
| D3 1.008 | Dummy atom of cytosine bonded to N3       |
| D1 1.008 | Dummy atom of DAP bonded to N1            |
| D4 1.008 | Dummy atom of thymine bonded to O4        |
| DH 1.008 | Cytosine H to be mutated to methyl carbon |

**Bonds**

|            |       |                 |
|------------|-------|-----------------|
| O -D6 434. | 0.400 | guanine for TI  |
| DH-D5 340. | 1.090 | cytosine for TI |
| NC-D3 434. | 0.400 | cytosine for TI |
| O -D4 434. | 0.400 | thymine         |
| NA-D1 434. | 0.400 | DAP             |
| CM-DH 317. | 1.080 | cytosine for TI |

**Angles**

|          |      |        |                           |
|----------|------|--------|---------------------------|
| CM-DH-D5 | 50.0 | 109.50 | cytosine with dummy atoms |
| D5-DH-D5 | 35.0 | 109.50 | cytosine with dummy atoms |
| CA-NC-D3 | 50.0 | 118.00 | cytosine with dummy atoms |
| D3-NC-C  | 50.0 | 116.80 | cytosine with dummy atoms |
| C -O -D6 | 50.0 | 120.0  | guanine with dummy atoms  |
| D6-O -D6 | 35.0 | 120.00 | guanine with dummy atoms  |
| D4-O -D4 | 35.0 | 120.00 | thymine with dummy atoms  |
| CA-O -D4 | 50.0 | 120.0  | thymine with dummy atoms  |
| CA-NA-D1 | 50.0 | 118.00 | DAP with dummy atoms      |
| D1-NA-CA | 50.0 | 116.80 | DAP with dummy atoms      |
| C -NA-D1 | 50.0 | 116.8  | DAP with dummy atoms      |
| CM-CM-DH | 50.0 | 119.70 | cytosine for TI           |
| DH-CM-CA | 50.0 | 123.30 | cytosine for TI           |

**Dihedrals**

|            |   |       |       |    |
|------------|---|-------|-------|----|
| X -CD-CD-X | 4 | 4.00  | 180.0 | 2. |
| X -CD-CT-X | 6 | 0.00  | 0.0   | 2. |
| X -CD-CM-X | 4 | 26.60 | 180.0 | 2. |
| X -CM-DH-X | 6 | 0.00  | 0.0   | 3. |

**Improper dihedrals**

|             |     |      |    |                 |
|-------------|-----|------|----|-----------------|
| X -X -O -D6 | 1.0 | 180. | 2. | guanine for TI  |
| X -X -O -D4 | 1.0 | 180. | 2. | thymine for TI  |
| X -X -NC-D3 | 1.0 | 180. | 2. | cytosine for TI |
| X -X -NA-D1 | 1.0 | 180. | 2. | adenine for TI  |
| CM-CA-CM-DH | 1.1 | 180. | 2. | cytosine for TI |

**Non-bonded parameters**

|      |        |        |                      |
|------|--------|--------|----------------------|
| MOD4 | RE     |        |                      |
| D3   | 0.0    | 0.0    | dummy atom           |
| D4   | 0.0    | 0.0    | dummy atom           |
| D5   | 0.0    | 0.0    | dummy atom           |
| D6   | 0.0    | 0.0    | dummy atom           |
| DH   | 1.4590 | 0.0150 | H to be mutated to C |
